# Supplementary material for: The association between subgroups of MRI findings identified with latent class analysis and low back pain in 40-year-old Danes
Source: Springer Nature journal article supplement (doi:10.1186/s12891-018-1978-x), 2018-02-20
Supplement: MOESM1 [file 15478108]

# Additional file 1

**Table 1 a, b and c: Proportion of people with one or more segmental levels in Subgroup 1 for each of the three pain measures ‘LBP past year’, ‘LBP past month’ and ‘Non-trivial LBP’**

**Table 1a**

| Subgroup 1 | No LBP past month; n (%) | LBP past month; n (%) | Total     |
|------------|--------------------------|-----------------------|-----------|
| No         | 3 (1%)                   | 4 (2%)                | 7 (2%)    |
| Yes        | 234 (99%)                | 171 (98%)             | 405 (98%) |
| Total      | 237                      | 175                   | 412       |

**Table 1b**

| Subgroup 1 | No LBP past year; n (%) | LBP past year; n (%) | Total     |
|------------|-------------------------|----------------------|-----------|
| No         | 0 (0%)                  | 7 (2%)               | 7 (2%)    |
| Yes        | 128 (100%)              | 277 (98%)            | 405 (98%) |
| Total      | 128                     | 284                  | 412       |

**Table 1c**

| Subgroup 1 | No non-trivial LBP; n (%) | Non-trivial LBP; n (%) | Total     |
|------------|---------------------------|------------------------|-----------|
| No         | 5 (1%)                    | 2 (3%)                 | 7 (2%)    |
| Yes        | 332 (99%)                 | 73 (97%)               | 405 (98%) |
| Total      | 337                       | 75                     | 412       |

**Table 2 a, b and c: Proportion of people with one or more segmental levels in Subgroup 2 for each of the three pain measures ‘LBP past year’, ‘LBP past month’ and ‘Non-trivial LBP’**

**Table 2a**

| Subgroup 2 | No LBP past month; n (%) | LBP past month; n (%) | Total     |
|------------|--------------------------|-----------------------|-----------|
| No         | 81 (34%)                 | 50 (29%)              | 131 (32%) |
| Yes        | 156 (66%)                | 125 (71%)             | 281 (68%) |
| Total      | 237                      | 175                   | 412       |

**Table 2b**

| Subgroup 2 | No LBP past year; n (%) | LBP past year; n (%) | Total     |
|------------|-------------------------|----------------------|-----------|
| No         | 49 (38%)                | 82 (29%)             | 131 (32%) |
| Yes        | 79 (62%)                | 202 (71%)            | 281 (68%) |
| Total      | 128                     | 284                  | 412       |

**Table 2c**

| Subgroup 2 | No non-trivial LBP; n (%) | Non-trivial LBP; n (%) | Total     |
|------------|---------------------------|------------------------|-----------|
| No         | 113 (34%)                 | 18 (24%)               | 131 (32%) |
| Yes        | 224 (66%)                 | 57 (76%)               | 281 (68%) |
| Total      | 337                       | 75                     | 412       |

# Additional file 1

**Table 3 a, b and c: Proportion of people with one or more segmental levels in Subgroup 3 for each of the three pain measures ‘LBP past year’, ‘LBP past month’ and ‘Non-trivial LBP’**

**Table 3a**

| Subgroup 3 | No LBP past month; n (%) | LBP past month; n (%) | Total     |
|------------|--------------------------|-----------------------|-----------|
| No         | 209 (88%)                | 157 (90%)             | 366 (89%) |
| Yes        | 28 (12%)                 | 18 (10%)              | 46 (11%)  |
| Total      | 237                      | 175                   | 412       |

**Table 3b**

| Subgroup 3 | No LBP past year; n (%) | LBP past year; n (%) | Total     |
|------------|-------------------------|----------------------|-----------|
| No         | 114 (89%)               | 252 (89%)            | 366 (89%) |
| Yes        | 14 (11%)                | 32 (11%)             | 46 (11%)  |
| Total      | 128                     | 284                  | 412       |

**Table 3c**

| Subgroup 3 | No non-trivial LBP; n (%) | Non-trivial LBP; n (%) | Total     |
|------------|---------------------------|------------------------|-----------|
| No         | 301 (89%)                 | 65 (87%)               | 366 (89%) |
| Yes        | 36 (11%)                  | 10 (13%)               | 46 (11%)  |
| Total      | 337                       | 75                     | 412       |

**Table 4 a, b and c: Proportion of people with one or more segmental levels in Subgroup 4 for each of the three pain measures ‘LBP past year’, ‘LBP past month’ and ‘Non-trivial LBP’**

**Table 4a**

| Subgroup 4 | No LBP past month; n (%) | LBP past month; n (%) | Total     |
|------------|--------------------------|-----------------------|-----------|
| No         | 173 (73%)                | 127 (73%)             | 300 (73%) |
| Yes        | 64 (27%)                 | 48 (27%)              | 112 (27%) |
| Total      | 237                      | 175                   | 412       |

**Table 4b**

| Subgroup 4 | No LBP past year; n (%) | LBP past year; n (%) | Total     |
|------------|-------------------------|----------------------|-----------|
| No         | 107 (84%)               | 193 (68%)            | 300 (73%) |
| Yes        | 21 (16%)                | 91 (32%)             | 112 (27%) |
| Total      | 128                     | 284                  | 412       |

**Table 4c**

| Subgroup 4 | No non-trivial LBP; n (%) | Non-trivial LBP; n (%) | Total     |
|------------|---------------------------|------------------------|-----------|
| No         | 247 (73%)                 | 53 (71%)               | 300 (73%) |
| Yes        | 90 (27%)                  | 22 (29%)               | 112 (27%) |
| Total      | 337                       | 75                     | 412       |

# Additional file 1

**Table 5 a, b and c: Proportion of people with one or more segmental levels in Subgroup 5 for each of the three pain measures ‘LBP past year’, ‘LBP past month’ and ‘Non-trivial LBP’**

**Table 5a**

| Subgroup 5 | No LBP past month; n (%) | LBP past month; n (%) | Total     |
|------------|--------------------------|-----------------------|-----------|
| No         | 231 (97%)                | 163 (93%)             | 394 (96%) |
| Yes        | 6 (3%)                   | 12 (7%)               | 18 (4%)   |
| Total      | 237                      | 175                   | 412       |

**Table 5b**

| Subgroup 5 | No LBP past year; n (%) | LBP past year; n (%) | Total     |
|------------|-------------------------|----------------------|-----------|
| No         | 127 (99%)               | 267 (94%)            | 394 (96%) |
| Yes        | 1 (1%)                  | 17 (6%)              | 18 (3%)   |
| Total      | 128                     | 284                  | 412       |

**Table 5c**

| Subgroup 5 | No non-trivial LBP; n (%) | Non-trivial LBP; n (%) | Total     |
|------------|---------------------------|------------------------|-----------|
| No         | 328 (97%)                 | 66 (88%)               | 394 (96%) |
| Yes        | 9 (3%)                    | 9 (12%)                | 18 (4%)   |
| Total      | 337                       | 75                     | 412       |

**Table 6 a, b and c: Proportion of people with one or more segmental levels in Subgroup 6 for each of the three pain measures ‘LBP past year’, ‘LBP past month’ and ‘Non-trivial LBP’**

**Table 6a**

| Subgroup 6 | No LBP past month; n (%) | LBP past month; n (%) | Total     |
|------------|--------------------------|-----------------------|-----------|
| No         | 207 (87%)                | 158 (90%)             | 365 (89%) |
| Yes        | 30 (13%)                 | 17 (10%)              | 47 (11%)  |
| Total      | 237                      | 175                   | 412       |

**Table 6b**

| Subgroup 6 | No LBP past year; n (%) | LBP past year; n (%) | Total     |
|------------|-------------------------|----------------------|-----------|
| No         | 113 (88%)               | 252 (89%)            | 365 (89%) |
| Yes        | 15 (12%)                | 32 (11%)             | 47 (11%)  |
| Total      | 128                     | 284                  | 412       |

**Table 6c**

| Subgroup 6 | No non-trivial LBP; n (%) | Non-trivial LBP; n (%) | Total     |
|------------|---------------------------|------------------------|-----------|
| No         | 297 (88%)                 | 68 (91%)               | 365 (89%) |
| Yes        | 40 (12%)                  | 7 (9%)                 | 47 (11%)  |
| Total      | 337                       | 75                     | 412       |

# Additional file 1

**Table 7a, b and c: Proportion of people with all segments in Subgroup 1 vs. one or more segments in Subgroup 5 for each of the three pain measures 'LBP past year', 'LBP past month' and 'Non-trivial LBP'**

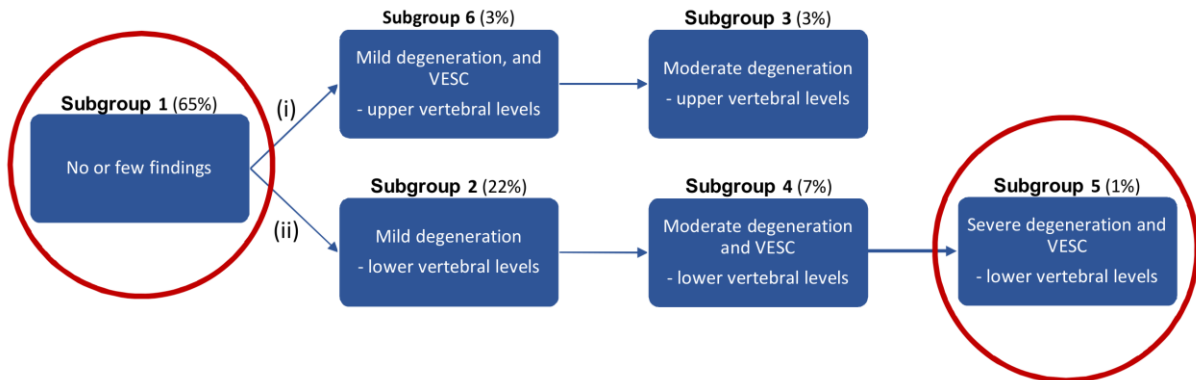

**Table 7a**

| All 5 levels in Subgroup 1 vs min. one level in Subgroup 5 | No LBP past month; n (%) | LBP past month; n (%) | Total    |
|------------------------------------------------------------|--------------------------|-----------------------|----------|
| Subgroup 1                                                 | 40 (87%)                 | 32 (73%)              | 72 (80%) |
| Subgroup 5                                                 | 6 (13%)                  | 12 (27%)              | 18 (20%) |
| All                                                        | 46                       | 44                    | 90       |

**Table 7b**

| All 5 levels in Subgroup 1 vs min. one level in Subgroup 5 | No LBP past year; n (%) | LBP past year; n (%) | Total    |
|------------------------------------------------------------|-------------------------|----------------------|----------|
| Subgroup 1                                                 | 29 (97%)                | 43 (72%)             | 72 (80%) |
| Subgroup 5                                                 | 1 (3%)                  | 17 (28%)             | 18 (20%) |
| All                                                        | 46                      | 44                   | 90       |

**Table 7c**

| All 5 levels in Subgroup 1 vs min. one level in Subgroup 5 | No non-trivial LBP; n (%) | Non-trivial LBP; n (%) | Total    |
|------------------------------------------------------------|---------------------------|------------------------|----------|
| Subgroup 1                                                 | 61 (87%)                  | 11 (55%)               | 72 (80%) |
| Subgroup 5                                                 | 9 (13%)                   | 9 (45%)                | 18 (20%) |
| All                                                        | 70                        | 20                     | 90       |

# Additional file 1

**Table 8a, b and c: Proportion of people with all segments in Subgroup 1 vs. one or more segments in Subgroup 4 but no segments in Subgroup 5 for each of the three pain measures ‘LBP past year’, ‘LBP past month’ and ‘Non-trivial LBP’**

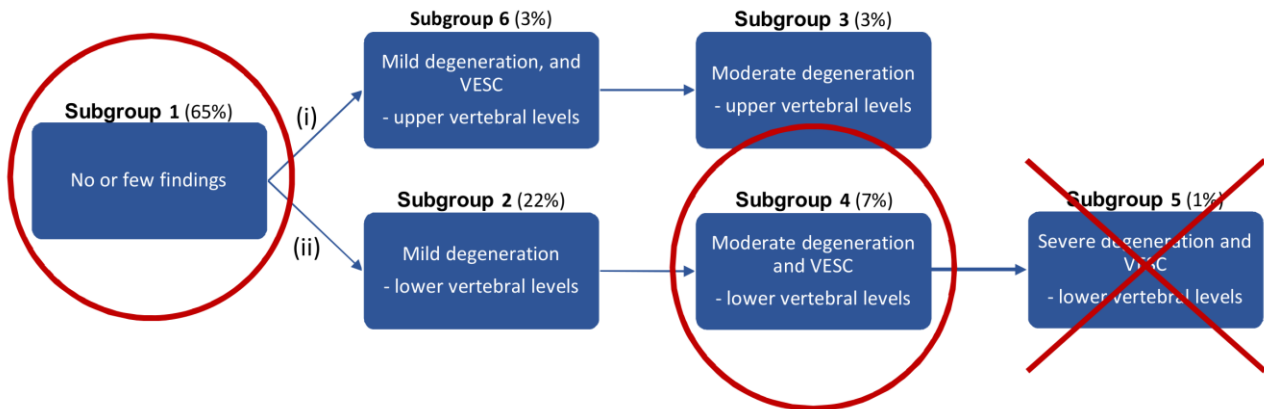

**Table 8a**

| All 5 levels in Subgroup 1 vs min. one level in Subgroup 4 but not Subgroup 5 | No LBP past month; n (%) | LBP past month; n (%) | Total     |
|-------------------------------------------------------------------------------|--------------------------|-----------------------|-----------|
| Subgroup 1                                                                    | 40 (40%)                 | 32 (40%)              | 72 (40%)  |
| Subgroup 4                                                                    | 61 (60%)                 | 48 (60%)              | 109 (60%) |
| All                                                                           | 101                      | 80                    | 181       |

**Table 8b**

| All 5 levels in Subgroup 1 vs min. one level in Subgroup 4 but not Subgroup 5 | No LBP past year; n (%) | LBP past year; n (%) | Total     |
|-------------------------------------------------------------------------------|-------------------------|----------------------|-----------|
| Subgroup 1                                                                    | 29 (59%)                | 43 (33%)             | 72 (40%)  |
| Subgroup 4                                                                    | 20 (41%)                | 89 (67%)             | 109 (60%) |
| All                                                                           | 49                      | 132                  | 181       |

**Table 8c**

| All 5 levels in Subgroup 1 vs min. one level in Subgroup 4 but not Subgroup 5 | No non-trivial LBP; n (%) | Non-trivial LBP; n (%) | Total     |
|-------------------------------------------------------------------------------|---------------------------|------------------------|-----------|
| Subgroup 1                                                                    | 61 (41%)                  | 11 (33%)               | 72 (40%)  |
| Subgroup 4                                                                    | 87 (59%)                  | 22 (67%)               | 109 (60%) |
| All                                                                           | 148                       | 33                     | 181       |

# Additional file 1

**Table 9a, b and c: Proportion of people with all segments in Subgroup 1 vs. one or more segments in Subgroup 4 or Subgroup 5 for each of the three pain measures 'LBP past year', 'LBP past month' and 'Non-trivial LBP'**

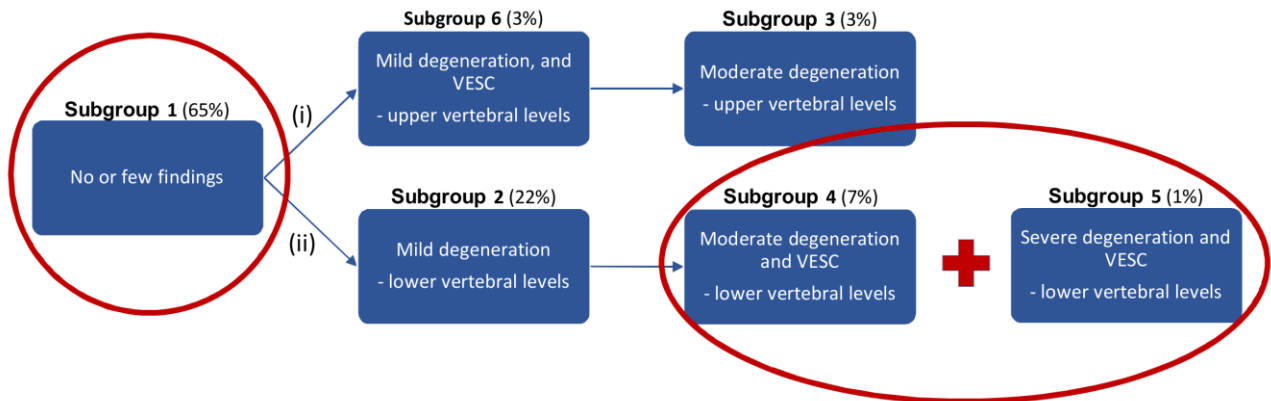

**Table 9a**

| All 5 levels in Subgroup 1 vs min. one level in Subgroup 4 or in Subgroup 5 | No LBP past month; n (%) | LBP past month; n (%) | Total     |
|-----------------------------------------------------------------------------|--------------------------|-----------------------|-----------|
| Subgroup 1                                                                  | 40 (37%)                 | 32 (35%)              | 72 (36%)  |
| Subgroup 4 or 5                                                             | 67 (63%)                 | 60 (65%)              | 127 (64%) |
| All                                                                         | 107                      | 92                    | 199       |

**Table 9b**

| All 5 levels in Subgroup 1 vs min. one level in Subgroup 4 or in Subgroup 5 | No LBP past year; n (%) | LBP past year; n (%) | Total     |
|-----------------------------------------------------------------------------|-------------------------|----------------------|-----------|
| Subgroup 1                                                                  | 29 (58%)                | 43 (29%)             | 72 (36%)  |
| Subgroup 4 or 5                                                             | 21 (42%)                | 106 (71%)            | 127 (64%) |
| All                                                                         | 50                      | 149                  | 199       |

**Table 9c**

| All 5 levels in Subgroup 1 vs min. one level in Subgroup 4 or in Subgroup 5 | No non-trivial LBP; n (%) | Non-trivial LBP; n (%) | Total     |
|-----------------------------------------------------------------------------|---------------------------|------------------------|-----------|
| Subgroup 1                                                                  | 61 (39%)                  | 11 (26%)               | 72 (36%)  |
| Subgroup 4 or 5                                                             | 96 (61%)                  | 31 (74%)               | 127 (64%) |
| All                                                                         | 157                       | 42                     | 199       |

# Additional file 1

**Table 10a, b and c: Proportion of people with all segments in Subgroup 1 vs. one or more segments in Subgroup 2 but no segments in Subgroup 4 or Subgroup 5 for each of the three pain measures ‘LBP past year’, ‘LBP past month’ and ‘Non-trivial LBP’**

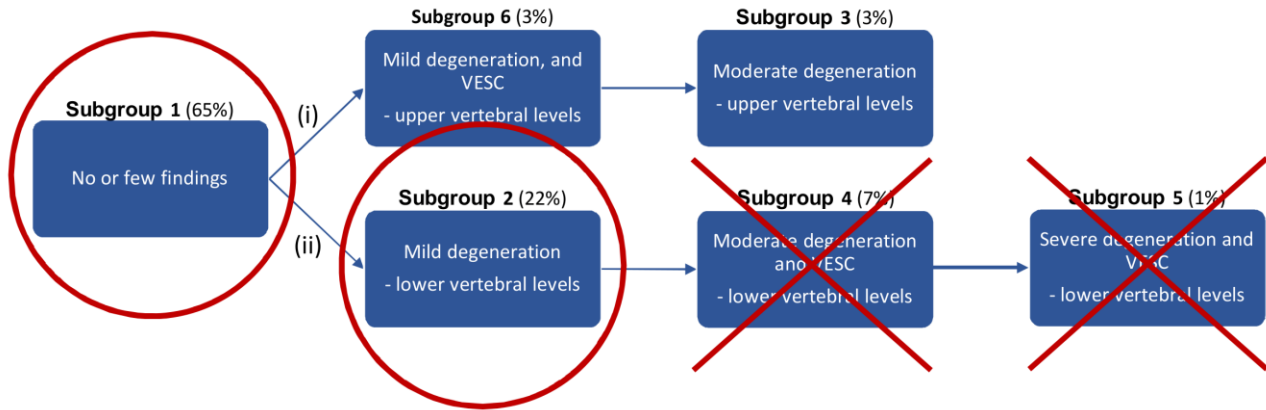

**Table 10a**

| All 5 levels in Subgroup 1 vs min. one level in Subgroup 2 but no levels in Subgroup 4 or Subgroup 5 | No LBP past month; n (%) | LBP past month; n (%) | Total     |
|------------------------------------------------------------------------------------------------------|--------------------------|-----------------------|-----------|
| Subgroup 1                                                                                           | 40 (25%)                 | 32 (29%)              | 72 (27%)  |
| Subgroup 2                                                                                           | 118 (75%)                | 78 (71%)              | 196 (73%) |
| All                                                                                                  | 158                      | 110                   | 268       |

**Table 10b**

| All 5 levels in Subgroup 1 vs min. one level in Subgroup 2 but no levels in Subgroup 4 or Subgroup 5 | No LBP past year; n (%) | LBP past year; n (%) | Total     |
|------------------------------------------------------------------------------------------------------|-------------------------|----------------------|-----------|
| Subgroup 1                                                                                           | 29 (30%)                | 43 (25%)             | 72 (27%)  |
| Subgroup 2                                                                                           | 69 (70%)                | 127 (75%)            | 196 (73%) |
| All                                                                                                  | 98                      | 170                  | 268       |

**Table 10c**

| All 5 levels in Subgroup 1 vs min. one level in Subgroup 2 but no levels in Subgroup 4 or Subgroup 5 | No non-trivial LBP; n (%) | Non-trivial LBP; n (%) | Total     |
|------------------------------------------------------------------------------------------------------|---------------------------|------------------------|-----------|
| Subgroup 1                                                                                           | 61 (27%)                  | 11 (26%)               | 72 (27%)  |
| Subgroup 2                                                                                           | 165 (73%)                 | 31 (74%)               | 196 (73%) |
| All                                                                                                  | 226                       | 42                     | 268       |

# Additional file 1

**Table 11a, b and c: Proportion of people with all segments in Subgroup 1 vs. one or more segments in Subgroup 3 but no segments in Subgroup 4 or Subgroup 5 for each of the three pain measures ‘LBP past year’, ‘LBP past month’ and ‘Non-trivial LBP’**

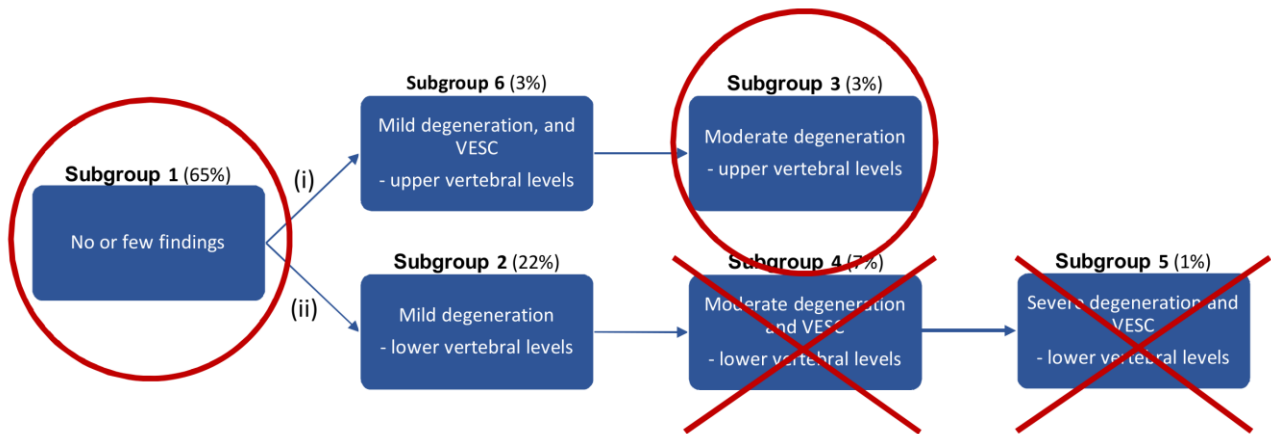

**Table 11a**

| All 5 levels in Subgroup 1 vs min. one level in Subgroup 3 but no levels in Subgroup 4 or 5 | No LBP past month; n (%) | LBP past month; n (%) | Total    |
|---------------------------------------------------------------------------------------------|--------------------------|-----------------------|----------|
| Subgroup 1                                                                                  | 40 (70%)                 | 32 (71%)              | 72 (71%) |
| Subgroup 3                                                                                  | 17 (30%)                 | 13 (29%)              | 30 (29%) |
| All                                                                                         | 57                       | 45                    | 102      |

**Table 11b**

| All 5 levels in Subgroup 1 vs min. one level in Subgroup 3 but no levels in Subgroup 4 or 5 | No LBP past year; n (%) | LBP past year; n (%) | Total    |
|---------------------------------------------------------------------------------------------|-------------------------|----------------------|----------|
| Subgroup 1                                                                                  | 29 (76%)                | 43 (67%)             | 72 (71%) |
| Subgroup 3                                                                                  | 9 (24%)                 | 21 (33%)             | 30 (29%) |
| All                                                                                         | 38                      | 64                   | 102      |

**Table 11c**

| All 5 levels in Subgroup 1 vs min. one level in Subgroup 3 but no levels in Subgroup 4 or 5 | No Non-trivial LBP n (%) | LBP non-trivial; n (%) | Total    |
|---------------------------------------------------------------------------------------------|--------------------------|------------------------|----------|
| Subgroup 1                                                                                  | 61 (73%)                 | 11 (61%)               | 72 (71%) |
| Subgroup 3                                                                                  | 23 (27%)                 | 7 (39%)                | 30 (29%) |
| All                                                                                         | 84                       | 18                     | 102      |



# Additional file 1

**Table 12a, b and c: Proportion of people with all segments in Subgroup 1 vs. one or more segments in Subgroup 6 but no segments in Subgroup 3, Subgroup 4 or Subgroup 5 for each of the three pain measures ‘LBP past year’, ‘LBP past month’ and ‘Non-trivial LBP’**

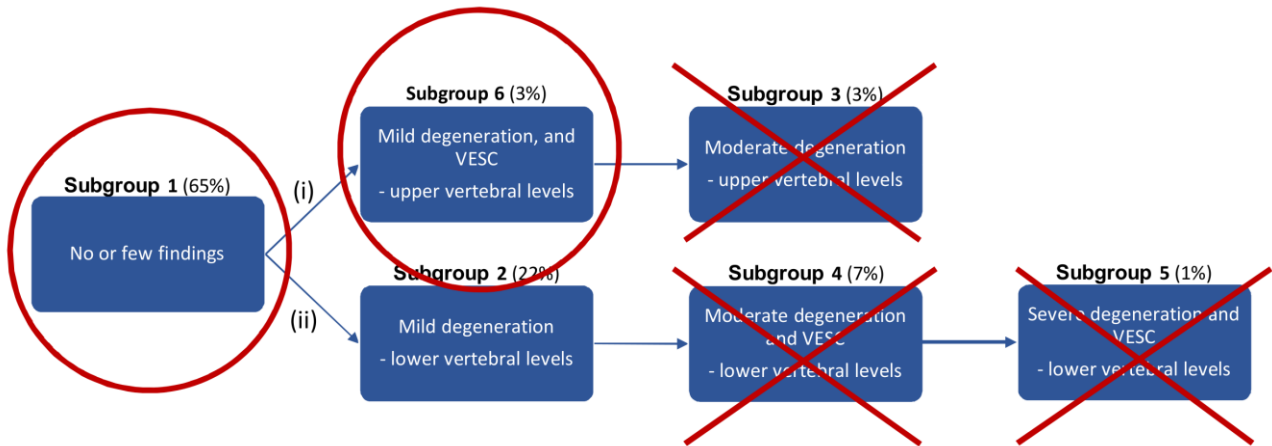

**Table 12a**

| All 5 levels in Subgroup 1 vs min. one level in Subgroup 6 but no levels in Subgroup 4, 5 or 3 | No LBP past month; n (%) | LBP past month; n (%) | Total    |
|------------------------------------------------------------------------------------------------|--------------------------|-----------------------|----------|
| Subgroup 1                                                                                     | 40 (65%)                 | 32 (78%)              | 72 (70%) |
| Subgroup 6                                                                                     | 22 (35%)                 | 9 (22%)               | 31 (30%) |
| All                                                                                            | 62                       | 41                    | 103      |

**Table 12b**

| All 5 levels in Subgroup 1 vs min. one level in Subgroup 6 but no levels in Subgroup 4, 5 or 3 | No LBP past year; n (%) | LBP past year; n (%) | Total    |
|------------------------------------------------------------------------------------------------|-------------------------|----------------------|----------|
| Subgroup 1                                                                                     | 29 (71%)                | 43 (69%)             | 72 (70%) |
| Subgroup 6                                                                                     | 12 (29%)                | 19 (31%)             | 31 (30%) |
| All                                                                                            | 41                      | 62                   | 103      |

**Table 12c**

| All 5 levels in Subgroup 1 vs min. one level in Subgroup 6 but no levels in Subgroup 4, 5 or 3 | No non-trivial LBP; n (%) | Non-trivial LBP; n (%) | Total    |
|------------------------------------------------------------------------------------------------|---------------------------|------------------------|----------|
| Subgroup 1                                                                                     | 61 (69%)                  | 11 (79%)               | 72 (70%) |
| Subgroup 6                                                                                     | 28 (31%)                  | 3 (21%)                | 31 (30%) |
| All                                                                                            | 89                        | 14                     | 103      |

# Additional file 1

**Table 13a, b and c: Proportion of people with all segments in Subgroup 1 vs. one or more segments in Subgroup 6 and Subgroup 3 but no segments in Subgroup 4 or Subgroup 5 for each of the three pain measures 'LBP past year', 'LBP past month' and 'Non-trivial LBP'**

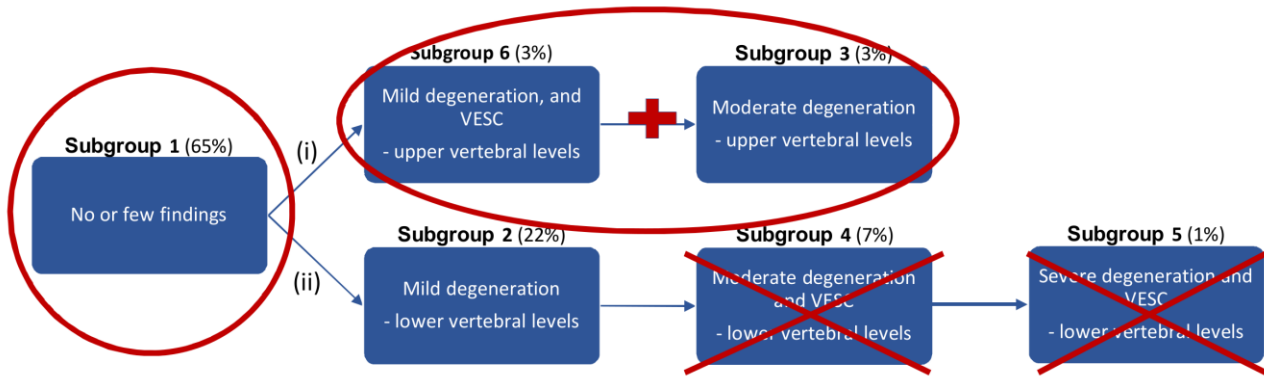

**Table 13a**

| All 5 levels in Subgroup 1 vs min. one level in Subgroup 3 or 6 but no levels in Subgroup 4 or 5 | No LBP past month; n (%) | LBP past month; n (%) | Total    |
|--------------------------------------------------------------------------------------------------|--------------------------|-----------------------|----------|
| Subgroup 1                                                                                       | 40 (51%)                 | 32 (59%)              | 72 (54%) |
| Subgroup 3 or 6                                                                                  | 39 (49%)                 | 22 (41%)              | 61 (46%) |
| All                                                                                              | 79                       | 54                    | 133      |

**Table 13b**

| All 5 levels in Subgroup 1 vs min. one level in Subgroup 3 or 6 but no levels in Subgroup 4 or 5 | No LBP past year; n (%) | LBP past year; n (%) | Total    |
|--------------------------------------------------------------------------------------------------|-------------------------|----------------------|----------|
| Subgroup 1                                                                                       | 29 (58%)                | 43 (52%)             | 72 (54%) |
| Subgroup 3 or 6                                                                                  | 21 (42%)                | 40 (48%)             | 61 (46%) |
| All                                                                                              | 50                      | 83                   | 133      |

**Table 13c**

| All 5 levels in Subgroup 1 vs min. one level in Subgroup 3 or 6 but no levels in Subgroup 4 or 5 | No non-trivial LBP; n (%) | Non-trivial LBP; n (%) | Total    |
|--------------------------------------------------------------------------------------------------|---------------------------|------------------------|----------|
| Subgroup 1                                                                                       | 61 (54%)                  | 11 (52%)               | 72 (54%) |
| Subgroup 3 or 6                                                                                  | 51 (46%)                  | 10 (48%)               | 61 (46%) |
| All                                                                                              | 112                       | 21                     | 133      |
